# Supplementary material
Source: publisher figshare collection journal article supplement (https://acs.figshare.com/ndownloader/files/4370083)
Supplement: Supplementary file 1 [file 4370083]

 
data_bs09 
 
_audit_creation_method            SHELXL-97 
_chemical_name_systematic 
; 
 ? 
; 
_chemical_name_common             ? 
_chemical_melting_point           ? 
_chemical_formula_moiety          'C20 H12 F6 N2 O2'
_chemical_formula_sum 
 'C20 H12 F6 N2 O2' 
_chemical_formula_weight          426.32 
 
loop_ 
 _atom_type_symbol 
 _atom_type_description 
 _atom_type_scat_dispersion_real 
 _atom_type_scat_dispersion_imag 
 _atom_type_scat_source 
 'C'  'C'   0.0033   0.0016 
 'International Tables Vol C Tables 4.2.6.8 and 6.1.1.4' 
 'H'  'H'   0.0000   0.0000 
 'International Tables Vol C Tables 4.2.6.8 and 6.1.1.4' 
 'N'  'N'   0.0061   0.0033 
 'International Tables Vol C Tables 4.2.6.8 and 6.1.1.4' 
 'O'  'O'   0.0106   0.0060 
 'International Tables Vol C Tables 4.2.6.8 and 6.1.1.4' 
 'F'  'F'   0.0171   0.0103 
 'International Tables Vol C Tables 4.2.6.8 and 6.1.1.4' 
 
_symmetry_cell_setting            'monoclinic'
_symmetry_space_group_name_H-M    'C2/c'
 
loop_ 
 _symmetry_equiv_pos_as_xyz 
 'x, y, z' 
 '-x, y, -z+1/2' 
 'x+1/2, y+1/2, z' 
 '-x+1/2, y+1/2, -z+1/2' 
 '-x, -y, -z' 
 'x, -y, z-1/2' 
 '-x+1/2, -y+1/2, -z' 
 'x+1/2, -y+1/2, z-1/2' 
 
_cell_length_a                    9.961(2) 
_cell_length_b                    11.829(2) 
_cell_length_c                    15.068(3) 
_cell_angle_alpha                 90.00 
_cell_angle_beta                  93.10(3) 
_cell_angle_gamma                 90.00 
_cell_volume                      1772.9(6) 
_cell_formula_units_Z             4 
_cell_measurement_temperature     100(2) 
_cell_measurement_reflns_used     2235
_cell_measurement_theta_min       0.41 
_cell_measurement_theta_max       28.28 
 
_exptl_crystal_description        'block' 
_exptl_crystal_colour             'red'
_exptl_crystal_size_max           0.25
_exptl_crystal_size_mid           0.25
_exptl_crystal_size_min           0.2
_exptl_crystal_density_meas       ? 
_exptl_crystal_density_diffrn     1.597 
_exptl_crystal_density_method     'not measured' 
_exptl_crystal_F_000              864 
_exptl_absorpt_coefficient_mu     0.147 
_exptl_absorpt_correction_type    'empirical'
_exptl_absorpt_correction_T_min   0.963
_exptl_absorpt_correction_T_max   0.971
_exptl_absorpt_process_details    'Scalepack (W. Minor & Z. Otwinowski)'
 
_exptl_special_details 
; 
 ? 
; 
 
_diffrn_ambient_temperature       100(2) 
_diffrn_radiation_wavelength      0.71073 
_diffrn_radiation_type            MoK\a 
_diffrn_radiation_source          'fine-focus sealed tube' 
_diffrn_radiation_monochromator   graphite 
_diffrn_measurement_device_type   'Nonius Kappa-CCD'
_diffrn_measurement_method         'four-circle, ccd detector'
_diffrn_detector_area_resol_mean  ? 
_diffrn_standards_number          ? 
_diffrn_standards_interval_count  ? 
_diffrn_standards_interval_time   ? 
_diffrn_standards_decay_%         ? 
_diffrn_reflns_number             4072 
_diffrn_reflns_av_R_equivalents   0.0264 
_diffrn_reflns_av_sigmaI/netI     0.0381 
_diffrn_reflns_limit_h_min        -13 
_diffrn_reflns_limit_h_max        13 
_diffrn_reflns_limit_k_min        -15 
_diffrn_reflns_limit_k_max        15 
_diffrn_reflns_limit_l_min        -19 
_diffrn_reflns_limit_l_max        19 
_diffrn_reflns_theta_min          2.71 
_diffrn_reflns_theta_max          28.17 
_reflns_number_total              2165 
_reflns_number_gt                 1673 
_reflns_threshold_expression      >2sigma(I) 
 
_computing_data_collection        'Collect (Nonius BV, 1997-2000)'
_computing_cell_refinement        'HKL Scalepack (Otwinowski & Minor 1997)'
_computing_data_reduction        'HKL Denzo and Scalepack (Otwinowski & Minor 1997)' 
_computing_structure_solution     'SHELXS-97 (Sheldrick, 1990)' 
_computing_structure_refinement   'SHELXL-97 (Sheldrick, 1997)' 
_computing_molecular_graphics     ? 
_computing_publication_material   ? 
 
_refine_special_details 
; 
 Refinement of F^2^ against ALL reflections.  The weighted R-factor wR and 
 goodness of fit S are based on F^2^, conventional R-factors R are based 
 on F, with F set to zero for negative F^2^. The threshold expression of 
 F^2^ > 2sigma(F^2^) is used only for calculating R-factors(gt) etc. and is 
 not relevant to the choice of reflections for refinement.  R-factors based 
 on F^2^ are statistically about twice as large as those based on F, and R- 
 factors based on ALL data will be even larger. 
; 
 
_refine_ls_structure_factor_coef  Fsqd  
_refine_ls_matrix_type            full 
_refine_ls_weighting_scheme       calc  
_refine_ls_weighting_details 
 'calc w=1/[\s^2^(Fo^2^)+(0.0557P)^2^+0.0000P] where P=(Fo^2^+2Fc^2^)/3' 
_atom_sites_solution_primary      direct 
_atom_sites_solution_secondary    difmap 
_atom_sites_solution_hydrogens    geom 
_refine_ls_hydrogen_treatment     constr 
_refine_ls_extinction_method      none 
_refine_ls_extinction_coef        ? 
_refine_ls_number_reflns          2165 
_refine_ls_number_parameters      136 
_refine_ls_number_restraints      0 
_refine_ls_R_factor_all           0.0613 
_refine_ls_R_factor_gt            0.0424 
_refine_ls_wR_factor_ref          0.1189 
_refine_ls_wR_factor_gt           0.1104 
_refine_ls_goodness_of_fit_ref    1.308 
_refine_ls_restrained_S_all       1.308 
_refine_ls_shift/su_max           0.000 
_refine_ls_shift/su_mean          0.000 
 
loop_ 
 _atom_site_label 
 _atom_site_type_symbol 
 _atom_site_fract_x 
 _atom_site_fract_y 
 _atom_site_fract_z 
 _atom_site_U_iso_or_equiv 
 _atom_site_adp_type 
 _atom_site_occupancy 
 _atom_site_symmetry_multiplicity 
 _atom_site_calc_flag 
 _atom_site_refinement_flags 
 _atom_site_disorder_assembly 
 _atom_site_disorder_group 
O O 0.39779(10) 0.46930(10) -0.16624(7) 0.0201(3) Uani 1 1 d . . . 
N N 0.33903(12) 0.49366(12) 0.14280(8) 0.0170(3) Uani 1 1 d . . . 
H0A H 0.3783 0.5112 0.1931 0.020 Uiso 1 1 calc R . . 
F1 F 0.03390(10) 0.74196(9) 0.14524(8) 0.0366(3) Uani 1 1 d . . . 
C1 C 0.44074(14) 0.48132(13) -0.08823(10) 0.0145(3) Uani 1 1 d . . . 
F2 F 0.20826(11) 0.70345(9) 0.07348(7) 0.0297(3) Uani 1 1 d . . . 
C2 C 0.35933(14) 0.47346(13) -0.01414(10) 0.0158(3) Uani 1 1 d . . . 
H2A H 0.2690 0.4546 -0.0233 0.019 Uiso 1 1 calc R . . 
F3 F 0.21964(10) 0.69874(9) 0.21574(7) 0.0308(3) Uani 1 1 d . . . 
C3 C 0.41080(14) 0.49299(13) 0.07036(10) 0.0140(3) Uani 1 1 d . . . 
C11 C 0.19896(14) 0.46614(13) 0.13929(10) 0.0143(3) Uani 1 1 d . . . 
C12 C 0.10072(14) 0.55094(13) 0.14094(9) 0.0134(3) Uani 1 1 d . . . 
C13 C -0.03459(14) 0.52123(13) 0.13932(10) 0.0151(3) Uani 1 1 d . . . 
H13A H -0.0999 0.5773 0.1412 0.018 Uiso 1 1 calc R . . 
C14 C -0.07243(15) 0.40901(14) 0.13487(11) 0.0192(3) Uani 1 1 d . . . 
H14A H -0.1630 0.3896 0.1341 0.023 Uiso 1 1 calc R . . 
C15 C 0.02455(16) 0.32531(14) 0.13162(12) 0.0225(4) Uani 1 1 d . . . 
H15A H -0.0012 0.2498 0.1280 0.027 Uiso 1 1 calc R . . 
C16 C 0.15990(16) 0.35361(13) 0.13369(11) 0.0200(3) Uani 1 1 d . . . 
H16A H 0.2245 0.2971 0.1313 0.024 Uiso 1 1 calc R . . 
C17 C 0.14015(15) 0.67285(13) 0.14372(10) 0.0190(3) Uani 1 1 d . . . 
 
loop_ 
 _atom_site_aniso_label 
 _atom_site_aniso_U_11 
 _atom_site_aniso_U_22 
 _atom_site_aniso_U_33 
 _atom_site_aniso_U_23 
 _atom_site_aniso_U_13 
 _atom_site_aniso_U_12 
O 0.0126(5) 0.0386(7) 0.0091(5) -0.0011(5) -0.0007(4) -0.0002(5) 
N 0.0079(6) 0.0334(8) 0.0096(6) -0.0002(5) 0.0009(4) -0.0007(5) 
F1 0.0277(6) 0.0169(5) 0.0653(8) -0.0026(5) 0.0040(5) 0.0022(4) 
C1 0.0111(7) 0.0209(8) 0.0114(7) -0.0008(6) -0.0003(5) 0.0020(6) 
F2 0.0403(6) 0.0268(6) 0.0226(5) 0.0040(4) 0.0076(4) -0.0137(4) 
C2 0.0078(6) 0.0273(8) 0.0122(7) 0.0001(6) 0.0004(5) -0.0015(6) 
F3 0.0372(6) 0.0315(6) 0.0230(5) -0.0076(4) -0.0044(4) -0.0152(5) 
C3 0.0109(7) 0.0206(7) 0.0107(7) 0.0010(6) 0.0017(5) 0.0024(5) 
C11 0.0104(6) 0.0240(8) 0.0088(6) 0.0012(6) 0.0017(5) -0.0001(6) 
C12 0.0115(7) 0.0181(7) 0.0106(7) -0.0002(5) 0.0007(5) -0.0015(5) 
C13 0.0105(6) 0.0194(8) 0.0153(7) 0.0013(6) 0.0001(5) 0.0006(5) 
C14 0.0132(7) 0.0218(8) 0.0228(8) 0.0016(6) 0.0021(6) -0.0043(6) 
C15 0.0216(8) 0.0142(7) 0.0320(9) 0.0022(7) 0.0042(7) -0.0036(6) 
C16 0.0190(8) 0.0204(8) 0.0210(8) 0.0032(6) 0.0042(6) 0.0062(6) 
C17 0.0177(7) 0.0209(8) 0.0184(8) -0.0019(6) 0.0015(6) -0.0047(6) 
 
_geom_special_details 
; 
 All esds (except the esd in the dihedral angle between two l.s. planes) 
 are estimated using the full covariance matrix.  The cell esds are taken 
 into account individually in the estimation of esds in distances, angles 
 and torsion angles; correlations between esds in cell parameters are only 
 used when they are defined by crystal symmetry.  An approximate (isotropic) 
 treatment of cell esds is used for estimating esds involving l.s. planes. 
; 
 
loop_ 
 _geom_bond_atom_site_label_1 
 _geom_bond_atom_site_label_2 
 _geom_bond_distance 
 _geom_bond_site_symmetry_2 
 _geom_bond_publ_flag 
O C1 1.2372(18) . ? 
N C3 1.3367(19) . ? 
N C11 1.4308(18) . ? 
N H0A 0.8600 . ? 
F1 C17 1.3384(19) . ? 
C1 C2 1.418(2) . ? 
C1 C3 1.519(2) 5_665 ? 
F2 C17 1.3375(19) . ? 
C2 C3 1.366(2) . ? 
C2 H2A 0.9300 . ? 
F3 C17 1.3437(18) . ? 
C3 C1 1.519(2) 5_665 ? 
C11 C16 1.388(2) . ? 
C11 C12 1.402(2) . ? 
C12 C13 1.392(2) . ? 
C12 C17 1.495(2) . ? 
C13 C14 1.381(2) . ? 
C13 H13A 0.9300 . ? 
C14 C15 1.386(2) . ? 
C14 H14A 0.9300 . ? 
C15 C16 1.388(2) . ? 
C15 H15A 0.9300 . ? 
C16 H16A 0.9300 . ? 
 
loop_ 
 _geom_angle_atom_site_label_1 
 _geom_angle_atom_site_label_2 
 _geom_angle_atom_site_label_3 
 _geom_angle 
 _geom_angle_site_symmetry_1 
 _geom_angle_site_symmetry_3 
 _geom_angle_publ_flag 
C3 N C11 122.14(13) . . ? 
C3 N H0A 118.9 . . ? 
C11 N H0A 118.9 . . ? 
O C1 C2 123.88(13) . . ? 
O C1 C3 118.33(13) . 5_665 ? 
C2 C1 C3 117.79(12) . 5_665 ? 
C3 C2 C1 121.40(13) . . ? 
C3 C2 H2A 119.3 . . ? 
C1 C2 H2A 119.3 . . ? 
N C3 C2 124.87(13) . . ? 
N C3 C1 114.36(12) . 5_665 ? 
C2 C3 C1 120.76(13) . 5_665 ? 
C16 C11 C12 119.57(13) . . ? 
C16 C11 N 119.33(13) . . ? 
C12 C11 N 121.10(14) . . ? 
C13 C12 C11 119.67(13) . . ? 
C13 C12 C17 119.80(13) . . ? 
C11 C12 C17 120.53(13) . . ? 
C14 C13 C12 120.35(14) . . ? 
C14 C13 H13A 119.8 . . ? 
C12 C13 H13A 119.8 . . ? 
C13 C14 C15 119.97(14) . . ? 
C13 C14 H14A 120.0 . . ? 
C15 C14 H14A 120.0 . . ? 
C14 C15 C16 120.33(15) . . ? 
C14 C15 H15A 119.8 . . ? 
C16 C15 H15A 119.8 . . ? 
C15 C16 C11 120.09(14) . . ? 
C15 C16 H16A 120.0 . . ? 
C11 C16 H16A 120.0 . . ? 
F1 C17 F2 106.48(13) . . ? 
F1 C17 F3 106.20(13) . . ? 
F2 C17 F3 105.99(12) . . ? 
F1 C17 C12 112.52(12) . . ? 
F2 C17 C12 112.50(13) . . ? 
F3 C17 C12 112.64(13) . . ? 
 
loop_ 
 _geom_torsion_atom_site_label_1 
 _geom_torsion_atom_site_label_2 
 _geom_torsion_atom_site_label_3 
 _geom_torsion_atom_site_label_4 
 _geom_torsion 
 _geom_torsion_site_symmetry_1 
 _geom_torsion_site_symmetry_2 
 _geom_torsion_site_symmetry_3 
 _geom_torsion_site_symmetry_4 
 _geom_torsion_publ_flag 
O C1 C2 C3 -176.73(15) . . . . ? 
C3 C1 C2 C3 2.7(2) 5_665 . . . ? 
C11 N C3 C2 4.1(2) . . . . ? 
C11 N C3 C1 -177.04(14) . . . 5_665 ? 
C1 C2 C3 N 175.92(15) . . . . ? 
C1 C2 C3 C1 -2.8(3) . . . 5_665 ? 
C3 N C11 C16 77.9(2) . . . . ? 
C3 N C11 C12 -101.81(18) . . . . ? 
C16 C11 C12 C13 1.7(2) . . . . ? 
N C11 C12 C13 -178.65(13) . . . . ? 
C16 C11 C12 C17 -177.84(14) . . . . ? 
N C11 C12 C17 1.8(2) . . . . ? 
C11 C12 C13 C14 -0.9(2) . . . . ? 
C17 C12 C13 C14 178.64(14) . . . . ? 
C12 C13 C14 C15 -0.3(2) . . . . ? 
C13 C14 C15 C16 0.6(2) . . . . ? 
C14 C15 C16 C11 0.2(3) . . . . ? 
C12 C11 C16 C15 -1.3(2) . . . . ? 
N C11 C16 C15 179.00(14) . . . . ? 
C13 C12 C17 F1 0.6(2) . . . . ? 
C11 C12 C17 F1 -179.84(13) . . . . ? 
C13 C12 C17 F2 -119.63(15) . . . . ? 
C11 C12 C17 F2 59.90(18) . . . . ? 
C13 C12 C17 F3 120.64(15) . . . . ? 
C11 C12 C17 F3 -59.83(19) . . . . ? 
 
_diffrn_measured_fraction_theta_max    0.993 
_diffrn_reflns_theta_full              28.17 
_diffrn_measured_fraction_theta_full   0.993 
_refine_diff_density_max    0.327 
_refine_diff_density_min   -0.248 
_refine_diff_density_rms    0.057 
